# Supplementary material
Source: PubMed Central journal article supplement (PMC3350333)
Supplement: NIHMS223183-supplement-1.pdf [file NIHMS223183-supplement-1.pdf]

A. Bdp1

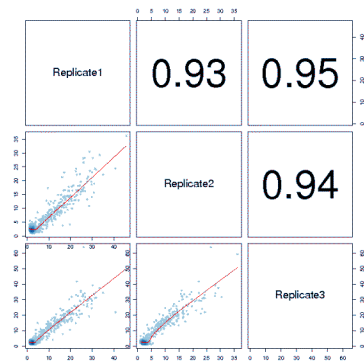

B. Brf1

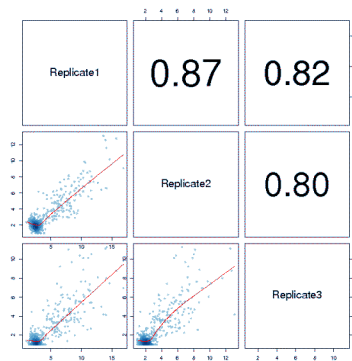

C. Brf2

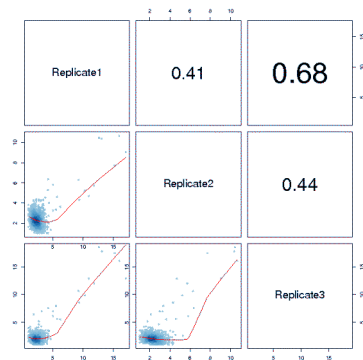

D. Rpc155

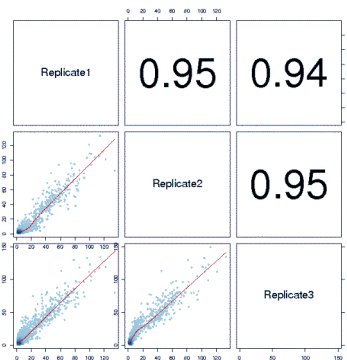

E. TFIIC110

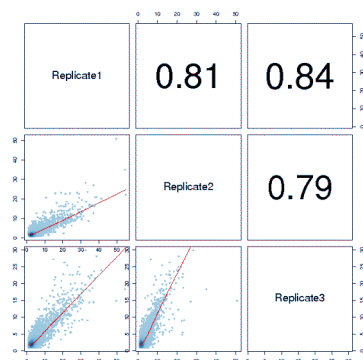

**Supplementary Figure 1.** Pairwise correlation of ChIP-seq data across biological replicates. Each panel shows a matrix of scatter plots representing signal correlations between pairs of replicates for the indicated protein.  $R^2$  is indicated diagonally opposite the scatter plot for each pair.
